# Supplementary material for: A green strategy for treating nitrate-contaminated wastewater using a zeolite P-based composite derived from rice husk ash
Source: Royal Society of Chemistry journal article supplement (doi:10.1039/d5su00593k), 2025-01-01
Supplement: d5su00593k1.pdf [file d5su00593k1.pdf]

## SUPPLEMENTARY INFORMATION

### **A green strategy for treating nitrate-contaminated wastewater using zeolite P-based composites derived from rice husk ash**

Nhu Y Nguyen-Thi,<sup>\*a</sup> Yen Nhi Nguyen-Thi,<sup>a</sup> Cuong-Quoc Nguyen,<sup>b</sup> Kim-Phung Ly,<sup>c</sup> Nguyen Minh Nhut,<sup>d</sup> Luong Huynh Vu Thanh,<sup>d</sup> Quang Le Dang,<sup>ef</sup> Quang De Tran,<sup>b</sup> and Phuong Lan Tran-Nguyen<sup>e</sup>

---

<sup>a</sup>*Faculty of Biological, Chemical, and Food Technology, Can Tho University of Technology, Can Tho 94000, Viet Nam.*

<sup>b</sup>*Department of Health Sciences, College of Natural Sciences, Can Tho University, Can Tho 94000, Vietnam.*

<sup>c</sup>*Stem Cell Laboratory, Department of Molecular Biology, Institute of Biotechnology and Food, Can Tho University, Can Tho 94000, Vietnam*

<sup>d</sup>*Faculty of Chemical Engineering, College of Engineering, Can Tho University, Can Tho 94000, Vietnam*

<sup>e</sup>*Institute of Materials Science, Vietnam Academy of Science and Technology (VAST), 18 Hoang Quoc Viet, Hanoi, Viet Nam*

<sup>f</sup>*Graduate University of Science and Technology, Vietnam Academy of Science and Technology (VAST), 18 Hoang Quoc Viet, Hanoi, Viet Nam*

<sup>g</sup>*Faculty of Mechanical Engineering, College of Engineering, Can Tho University, Can Tho 94000, Vietnam.*

\* Corresponding author, email: Email: [ntny@ctu.edu.vn](mailto:ntny@ctu.edu.vn); Tel: +84-909-163-385

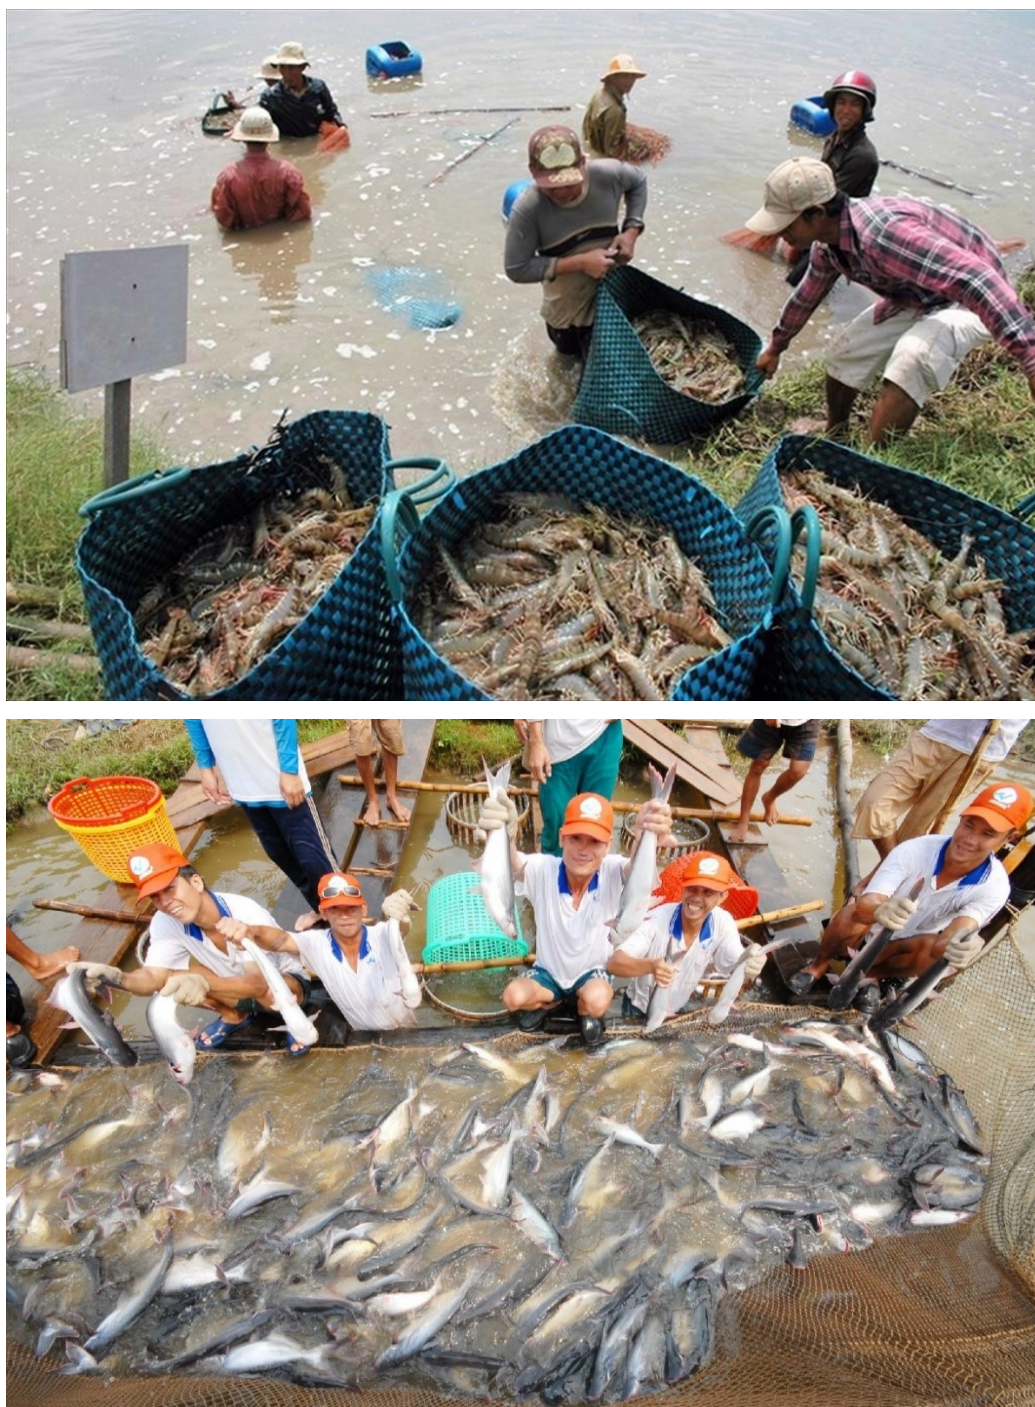

**Figure S1.** Vietnam's seafood exports set numerous records, solidifying its position as the world's third-largest seafood exporter

(Figures from <https://seafood.vasep.com.vn/why-buy-seafood/export-potentials/vietnam-the-third-largest-seafood-exporter-in-the-world-26061.html> and <https://seafood.vasep.com.vn/why-buy-seafood/vietnam-seafood-exports-broke-many-records-in-2022-26040.html>)

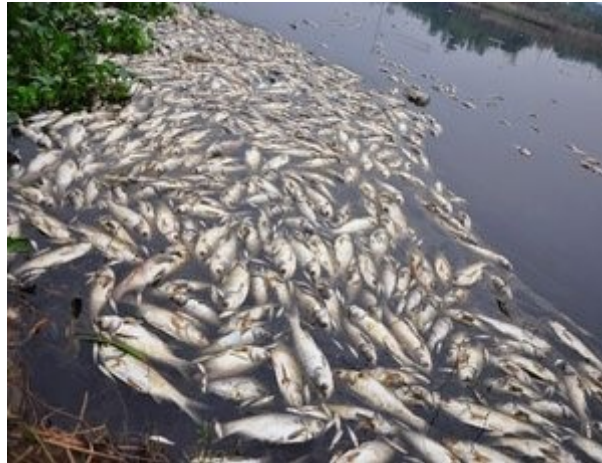

**Figure S2.** Mass Fish Deaths and the Future of Environmental Regulation in Vietnam

(Figures from <https://www.vietnam-briefing.com/news/fish-deaths-environmental-regulation-vietnam.html/>)

**Table S1. Factors affecting the synthesis of CZP composite**

| <b>Sample</b> | <b>Weight ratio of C:ZP<br/>(w:w)</b> | <b>Concentration of<br/>glutaraldehyde (%)</b> | <b>Mixing time<br/>(h)</b> |
|---------------|---------------------------------------|------------------------------------------------|----------------------------|
| CZP1          | 1:1                                   | 2                                              | 1.0                        |
| CZP2          | 1:2                                   |                                                |                            |
| CZP3          | 1:3                                   |                                                |                            |
| CZP4          | 1:4                                   |                                                |                            |
| CZP5          | 1:5                                   |                                                |                            |
| CZP6          | 1:2                                   | 1                                              | 1.0                        |
| CZP7          |                                       | 4                                              |                            |
| CZP8          |                                       | 6                                              |                            |
| CZP9          |                                       | 8                                              |                            |

**Table S2. Characteristic vibrations of ZP and CZP composites synthesized at various weight ratios of C:ZP**

| <b>ZP</b> | <b>Wavenumber (cm<sup>-1</sup>)</b> |             |             | <b>Types of vibration</b> |
|-----------|-------------------------------------|-------------|-------------|---------------------------|
|           | <b>CZP1</b>                         | <b>CZP2</b> | <b>CZP3</b> |                           |
| -         | 3744.6                              | 3766.8      | 3744.8      | O-H (chitosan)            |
| 3477.6    | 3449.3                              | 3422.7      | 3435.0      | O-H                       |
| -         | 2922.1                              | 2929.4      | 2921.1      | C-H (-CHO)                |
| -         | 2331.6                              | 2341.4      | 2335.8      | C=N                       |
| 1647.2    | 1653.6                              | 1654.5      | 1653.7      | O-H                       |
| -         | 1537.8                              | 1531.5      | 1530.7      | N-H (-NH <sub>2</sub> )   |
| -         | 1422.4                              | 1437.0      | 1438.0      | C-H                       |
| -         | 1030.1                              | 1010.0      | 1015.4      | C-O-C                     |
| 993.8     | 910.7                               | 998.7       | 992.0       | Si-O-Si                   |
| 740.9     | 692.1                               | 742.0       | 740.5       | Si-O-Si                   |
| 669.4     | 512.2                               | 669.0       | 670.1       | Al-O-Si                   |
| 608.0     | 497.6                               | 609.8       | 608.7       | Al-O                      |
